# Supplementary material for: Extracellular matrix signatures of human primary metastatic colon cancers and their metastases to liver
Source: PubMed Central journal article supplement (PMC4223627; doi:10.1186/1471-2407-14-518), 2014-07-18

# Additional File 6: GSEA Enrichment Plots

## Signature for Colon Tumor Metastasis to Liver

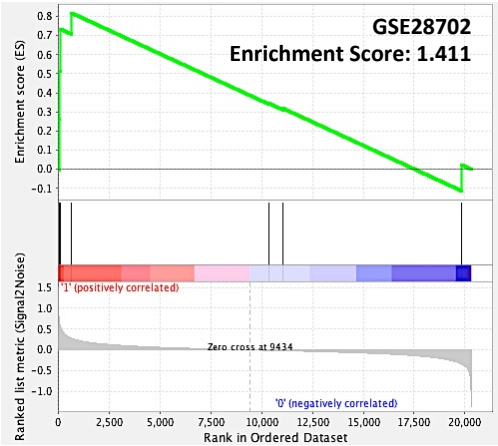

## Signature for Primary Colon Tumor

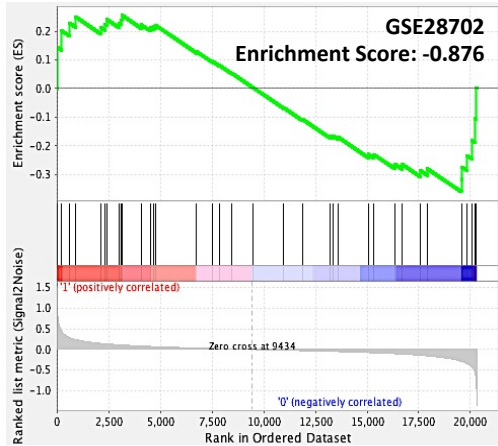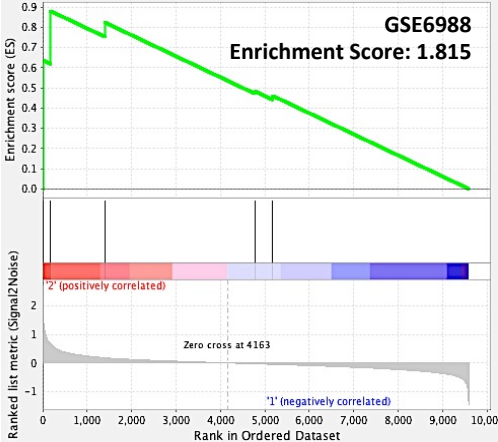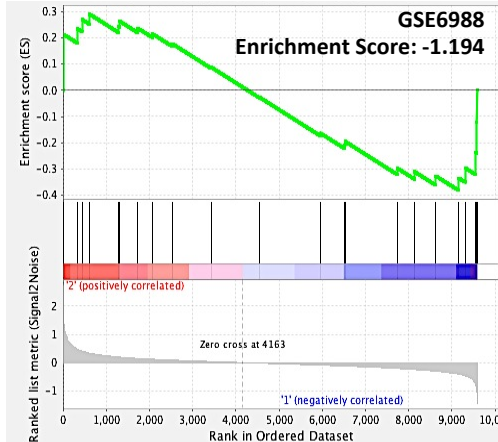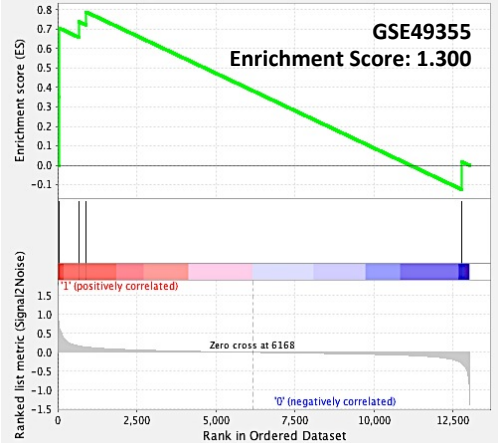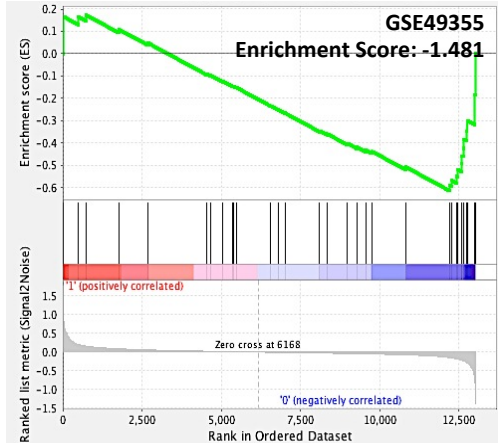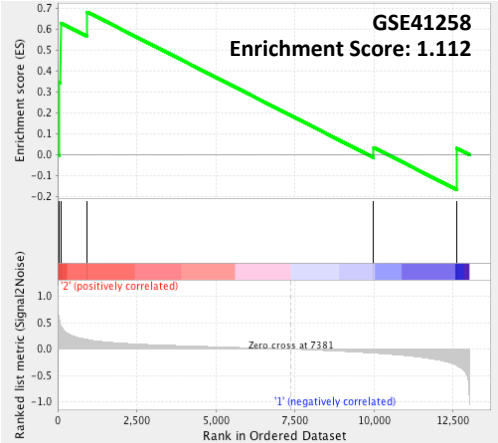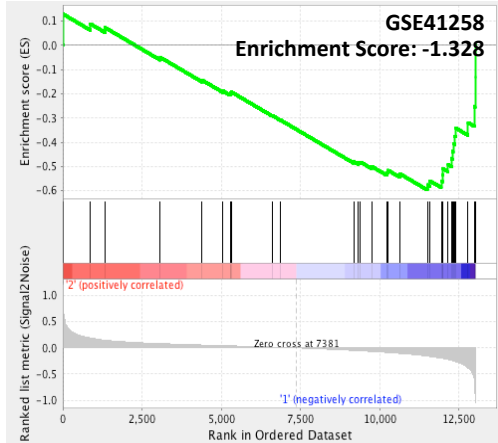

Supplement: 1471-2407-14-518-S6.pdf [file 1471-2407-14-518-S6.pdf]
